# Supplementary material
Source: ML conference proceedings conference paper supplement (https://proceedings.mlr.press/v124/zhang20b.html)
Supplement: Supplementary file [file zhang20b-supp.pdf]

# Selling Data at an Auction under Privacy Constraints

**Mengxiao Zhang**  
Business School  
The University of Auckland  
Auckland, NZ  
mengxiao.zhang@auckland.ac.nz

**Fernando Beltran**  
Business School  
The University of Auckland  
Auckland, NZ  
f.beltran@auckland.ac.nz

**Jiamou Liu**  
School of Computer Science  
The University of Auckland  
Auckland, NZ  
jiamou.liu@auckland.ac.nz

## Appendix A.

**Lemma 2.** For any integer  $1 \leq \alpha \leq n/4$  and  $\delta \in (0, 1)$ , if the query mechanism  $A$  is  $(\alpha, \delta)$ -PAC, then  $\alpha \geq \frac{n}{4 \sum_{i=1}^n \varepsilon_i q_i} \cdot (\ln \delta - \ln(1 - \delta))$ .

*Proof.* We prove the equivalent form, if  $A$  is  $(\alpha, \delta)$ -PAC, then  $\sum_{i=1}^n \varepsilon_i q_i \geq \frac{n(\ln \delta - \ln(1 - \delta))}{4\alpha}$ . We first consider count query. Recall that this case assumes that each data entry  $d_i$  is a 0/1-value. We assume for a contradiction that  $\sum_{i=1}^n \varepsilon_i q_i < \frac{n(\ln \delta - \ln(1 - \delta))}{4\alpha}$  and the query mechanism is  $(\alpha, \delta)$ -PAC. Let  $R = \{r \in \mathbb{R} \mid |r - \varphi(\vec{d}_{\text{gt}})| < \alpha\}$ . By the definition of  $(\alpha, \delta)$ -PAC,  $\Pr(\Phi(\vec{d}_{\text{gt}}) \in R) \geq \delta$ .

Assume, w.l.o.g., that  $\varepsilon_i q_i$  are sorted in ascending order, i.e.,  $\varepsilon_1 q_1 \leq \varepsilon_2 q_2 \leq \dots \leq \varepsilon_n q_n$ . Consider the first  $4\alpha$  data owners (Note that  $4\alpha \leq n$ ). Clearly,

$$\sum_{i=1}^{4\alpha} \varepsilon_i q_i < \frac{n(\ln \delta - \ln(1 - \delta))}{4\alpha} \frac{4\alpha}{n} = \ln \delta - \ln(1 - \delta).$$

Let  $\vec{d}^0 := (d_i)_{i \in I_0}$  and  $\vec{d}^1 := (d_i)_{i \in I_1}$  where  $I_j = \{1 \leq i \leq 4\alpha \mid d_i = j\}$  for  $j \in \{0, 1\}$ . Without loss of generality, assume that  $|\vec{d}^0| > 2\alpha$ . Let  $I' \subseteq I_0$  that contains exactly  $2\alpha$  elements, and define a dataset  $\vec{d}' := (b_1, \dots, b_n)$  where  $b_i = 1$  if  $i \in I'$ , and  $b_i = d_i$  otherwise. It follows that  $\varphi(\vec{d}') = \varphi(\vec{d}_{\text{gt}}) + 2\alpha$ .

It is straightforward to verify by definition of PDP that

$$\begin{aligned} \Pr(\Phi(\vec{d}') \in R) &\geq \exp\left(-\sum_{i \in I'} \varepsilon_i q_i\right) \Pr(\Phi(\vec{d}_{\text{gt}}) \in R) \\ &> \exp(-(\ln \delta - \ln(1 - \delta))) \times \delta \\ &= \frac{1 - \delta}{\delta} \cdot \delta = 1 - \delta \end{aligned}$$

Since  $\varphi(\vec{d}') = \varphi(\vec{d}_{\text{gt}}) + 2\alpha$ , by the triangle inequality, we have  $\Pr(|\Phi(\vec{d}') - \varphi(\vec{d}_{\text{gt}})| > \alpha) \geq$

$\Pr(|\Phi(\vec{d}') - \varphi(\vec{d}_{\text{gt}})| < \alpha) > 1 - \delta$ , which contradicts the  $(\alpha, \delta)$ -PAC assumption.

The proof is similar for the case when  $\varphi$  is the general linear predictor where the data entries are real values. The only difference is that we define the set  $I'$  as  $\{1, \dots, 2\alpha\}$  and the dataset  $\vec{d}'$  by  $b_i = d_i + \frac{1}{w_i}$  for all  $i \in I'$  and  $b_i = d_i$  otherwise.

For the case when  $\varphi$  is a median query. Assume  $d_1, d_2, \dots, d_n$  are distinct positive integers. We only deal with the case when  $n$  is odd (the case when  $n$  is even can be proven in a similar way). Let  $m$  denote the median among  $d_1, \dots, d_n$ . Let  $I_0 := \{i \mid d_i < m\}$  and  $I_1 := \{i \mid d_i > m\}$ . Suppose, w.l.o.g., that  $\sum_{i \in I_0} \varepsilon_i q_i < \frac{n(\ln \delta - \ln(1 - \delta))}{8\alpha}$ . Let  $k := |\{i \mid m \leq d_i < m + 2\alpha\}|$ . Note that by mutual distinction of data values,  $k \leq 2\alpha$ . For every  $i \in I_0$ , put  $i$  into  $H$  if the data owner  $s_i$ 's privacy requirement  $\varepsilon_i$  is among the smallest  $k$  among data owners in  $I_0$ . Clearly,  $\sum_{i \in H} \varepsilon_i q_i \leq \frac{n(\ln \delta - \ln(1 - \delta))}{4\alpha} \frac{2\alpha}{n} < \ln \delta - \ln(1 - \delta)$ . Let  $d_{\text{max}} := \max\{d_1, \dots, d_n\}$ . Define a new dataset  $\vec{d}' := (b_1, \dots, b_n)$  by  $b_i = d_i + d_{\text{max}}$  if  $i \in H$ ; and  $b_i = d_i$  otherwise. It then follows that the median of  $\vec{d}'$  is at least  $m + 2\alpha$  and thus  $\varphi(\vec{d}') \geq \varphi(\vec{d}_{\text{gt}}) + 2\alpha$ . By PDP of  $\Phi$ , we have  $\Pr(|\Phi(\vec{d}') - \varphi(\vec{d}_{\text{gt}})| < \alpha) > 1 - \delta$ . By the triangle inequality, we have  $\Pr(|\Phi(\vec{d}') - \varphi(\vec{d}')| > \alpha) \geq \Pr(|\Phi(\vec{d}') - \varphi(\vec{d}_{\text{gt}})| < \alpha) > 1 - \delta$ , which contradicts the accuracy assumption.  $\square$

## Appendix B.

**Lemma 3.** Assuming that  $\theta_i^*$  is independent from the reported valuation  $\psi_i$  for all  $1 \leq i \leq n$ , a simple direct mechanism  $\Psi$  is incentive compatible and individually rational.

*Proof.* For IR, suppose  $\theta_i \leq \theta_i^*$ . Then  $Q_i(\theta_i) = 1$ . By

(10),  $P_i(\theta_i)$  equals

$$\theta_i Q_i(\theta_i) + \int_{\theta_i}^{\bar{\theta}_i} Q_i(s) ds = \theta_i + \int_{\theta_i}^{\theta_i^*} 1 ds = \theta_i^*$$

and  $U_i(\theta_i|\theta_i) = P_i(\theta_i) - \theta_i Q_i(\theta_i) = \theta_i^* - \theta_i \geq 0$ . If  $\theta_i > \theta_i^*$ ,  $Q_i(\psi_i) = 0$  which implies  $P_i(\theta_i) = 0$  and  $U_i(\theta_i|\theta_i) = 0$ . In either case, the expected utility of reporting the valuation truthfully is non-negative.

For IC, note that  $\theta_i^*$  for all  $i \in \{1, \dots, n\}$  is independent from the reported valuation. When data owners report their valuations untruthfully, there are two cases:

Case (1) Suppose  $s_i$  reports a valuation  $\psi_i > \theta_i$ .

- a. if  $\theta_i < \psi_i \leq \theta_i^*$ ,  $U_i(\psi_i|\theta_i) = U_i(\theta_i|\theta_i) = \theta_i^* - \theta_i$ .
- b. if  $\theta_i \leq \theta_i^* < \psi_i$ ,  $U_i(\psi_i|\theta_i) = \theta_i^* - \theta_i \geq 0 = U_i(\psi_i|\theta_i)$ .
- c. if  $\theta_i^* < \theta_i < \psi_i$ ,  $U_i(\psi_i|\theta_i) = U_i(\theta_i|\theta_i) = 0$ .

Case (2) Suppose  $s_i$  reports a valuation  $\psi_i < \theta_i$ .

- a. if  $\psi_i < \theta_i \leq \theta_i^*$ ,  $U_i(\psi_i|\theta_i) = U_i(\theta_i|\theta_i) = \theta_i^* - \theta_i$ .
- b. if  $\psi_i \leq \theta_i^* < \theta_i$ ,  $U_i(\psi_i|\theta_i) = \theta_i^* - \theta_i < 0 = U_i(\theta_i|\theta_i)$ .
- c. if  $\theta_i^* < \psi_i < \theta_i$ ,  $U_i(\psi_i|\theta_i) = U_i(\theta_i|\theta_i) = 0$ .

The above argument shows that each data owner can maximise her expected utility by truthfully reporting the valuation.  $\square$

### Appendix C.

**Lemma 4.** The optimal solution to the optimisation problem (12) is an optimal threshold.

*Proof.* Firstly, since the threshold  $\theta_i^*$  is determined by solving (12), it is independent from  $\psi_i$ . By Lemma 3, IC and IR constraints are satisfied by allocation rule (9) and payment rule (10).

For the objective function, by substituting (2) the objective function becomes  $\sum_{i=1}^n \int_{\underline{\theta}}^{\bar{\theta}} \varepsilon_i Q_i(\psi_i) f_i(\psi_i) d\psi_i$ , which, by (9), is

$$\sum_{i=1}^n \int_{\underline{\theta}}^{\theta_i^*} \varepsilon_i f_i(\psi_i) d\psi_i = \sum_{i=1}^n \varepsilon_i F_i(\theta_i^*).$$

For BF, by (3) the left hand side of the constraint (6) is

$$\begin{aligned} & \sum_{i=1}^n \int_{\underline{\theta}}^{\bar{\theta}} P_i(\psi_i) f_i(\psi_i) d\psi_i \\ &= \sum_{i=1}^n \int_{\underline{\theta}}^{\bar{\theta}} \left( \psi_i Q_i(\psi_i) + \int_{\psi_i}^{\bar{\theta}} Q_i(s) ds \right) f_i(\psi_i) d\psi_i \quad \text{by (10)} \\ &= \sum_{i=1}^n \int_{\underline{\theta}}^{\theta_i^*} \theta_i^* f_i(\psi_i) d\psi_i = \sum_{i=1}^n \theta_i^* F_i(\theta_i^*) \end{aligned}$$

Thus (6) is equivalent to  $\sum_{i=1}^n \theta_i^* F_i(\theta_i^*) \leq B$ . Moreover, it is easy to see that (6) is binding, i.e.,  $\sum_{i=1}^n \theta_i^* F_i(\theta_i^*) = B$ . Otherwise, we can always increase the value of  $\theta_i^*$  and select more data owners.  $\square$

### Appendix D.

**Theorem 1.** The procurement mechanism  $\Psi$  guarantees to find the optimal solution of Problem (8).

*Proof.* By Lemma 4, we only need to show that the procurement mechanism  $\Psi$  solves Problem (12). Define  $B_i$  as  $\theta_i^* F_i(\theta_i^*)$ . The first constraint in (12) then becomes  $\sum_{i=1}^n B_i = B$ , which is affine in terms of  $B_i$ .

Also, since any  $B_i$  corresponds to a  $\theta_i^*$ , we can view  $\theta_i^*$  as a function of  $B_i$  and thus write  $B_i = \theta_i^*(B_i) F_i(\theta_i^*(B_i))$ . The derivative in terms of  $B_i$  is

$$1 = \theta_i^{*'}(B_i) F_i(\theta_i^*(B_i)) + \theta_i(B_i)^* f_i(\theta_i^*(B_i)) \theta_i^{*'}(B_i)$$

Reorganise the equation, we can get

$$f_i(\theta_i^*) \theta_i^{*'} = \frac{1}{\frac{F_i(\theta_i^*)}{f_i(\theta_i^*)} + \theta_i^*}.$$

Because of the regularity assumption, the denominator is strictly increasing. Thus,  $f_i(\theta_i^*) \theta_i^{*'}$  is strictly decreasing. Furthermore, the derivative of the objective function in terms of  $B_i$  is

$$\sum_{i=1}^n \varepsilon_i f_i(\theta_i^*(B_i)) \theta_i^{*'}(B_i).$$

It is strictly decreasing as well. Therefore, the objective is to maximise a concave function. The above arguments asserts the convexity of Problem (12).

Since Problem (12) is convex and the vector  $\vec{\theta}^*$  satisfies conditions (14) and (15), Karush-Kuhn-Tucker theorem (see (Luenberger, 1997)) implies that  $\vec{\theta}^*$  is the optimal solution to (12).  $\square$
